# Supplementary material for: Application of Polyamines and Amino Acid Derivatives Based on 2-Azabicycloalkane Backbone in Enantioselective Aldol Reaction
Source: Molecules. 2021 Aug 26;26(17):5166. doi: 10.3390/molecules26175166 (PMC8434137; doi:10.3390/molecules26175166)
Supplement: Supplementary file 1 [file molecules-26-05166-s001.zip › molecules-1360179-supplementary.pdf]

## **Supplementary Material**

# **Application of Polyamines and Amino Acid Derivatives Based on 2-Azabicycloalkane Backbone in a Stereoselective Aldol Reaction**

**Dominika Iwan, Karolina Kamińska, Elżbieta Wojaczyńska\***

Faculty of Chemistry, Wrocław University of Science and Technology, Wybrzeże Wyspiańskiego 27,  
50370 Wrocław, Poland

\*Correspondence: [elzbieta.wojaczynska@pwr.edu.pl](mailto:elzbieta.wojaczynska@pwr.edu.pl); Tel.: +48-713-202-410

## Content

|                                                        |    |
|--------------------------------------------------------|----|
| 1.General Information.....                             | 3  |
| 2.Copies of HPLC Chromatograms .....                   | 4  |
| 3.NMR Spectra of Catalyst <b>8</b> and <b>12</b> ..... | 12 |

## 1. General Information

All commercial reagents were purchased and used without further purification. All reactions were carried out in flame-dried glassware with magnetic stirring. Schmelzpunkt Bestimmer Apotec melting point apparatus (WEPA Apothekenbedarf GmbH & Co. KG., Hillscheid, Germany) was used for the determination of melting points in a standard open capillary.  $^1\text{H}$  and  $^{13}\text{C}$  NMR spectra were recorded on Jeol 400yh (Jeol Ltd., Tokyo, Japan), Bruker Avance III 500, and Bruker Avance II 600 spectrometers (Bruker, Billerica, MA, USA). The residual  $^1\text{H}$  or  $^{13}\text{C}$  signals of the solvent ( $\text{CDCl}_3$ ,  $\text{MeOH-d}_4$ ) were used as references. Multiplicity of chemical shift are reported as s = singlet, d = doublet, t = triplet, q = quartet, dd = doublet of doublets, m = multiplet and br = broad. Chemical shifts are given in ppm, and coupling constants are expressed in Hz. The spectra are shown in Supplementary Material. High-resolution mass spectra were recorded using electrospray ionization mode on a Waters LCT Premier XE TOF spectrometer (Waters Corporation, Milford, MA, USA). Infrared spectra were measured in a  $4000\text{--}400\text{ cm}^{-1}$  range on a Perkin Elmer 2000 FTIR instrument (PerkinElmer, Waltham, MA, USA). Optical rotations were determined with an automatic polarimeter Model AA-5 (OpticalActivity, Ltd., Ramsey, UK);  $[\alpha]^{20}_{\text{D}}$  values are expressed in  $10^{-1}\text{ deg cm}^2\text{ g}^{-1}$ . Silica gel 60 (60–200  $\mu\text{m}$ , 70–230 mesh) was used for column chromatography, and precoated plates precoated with the same adsorbent were applied for thin-layer chromatography. Diastereomeric ratio and enantiomeric excess were determined by high performance liquid chromatography (HPLC) with chiral columns (Chiralpak ASH and ADH).

## 2. Copies of HPLC Chromatograms

Racemic mixture

Chiralpak AS-H, hexane/isopropanol 85:15,  $\lambda = 254$  nm, 1.0 ml/min

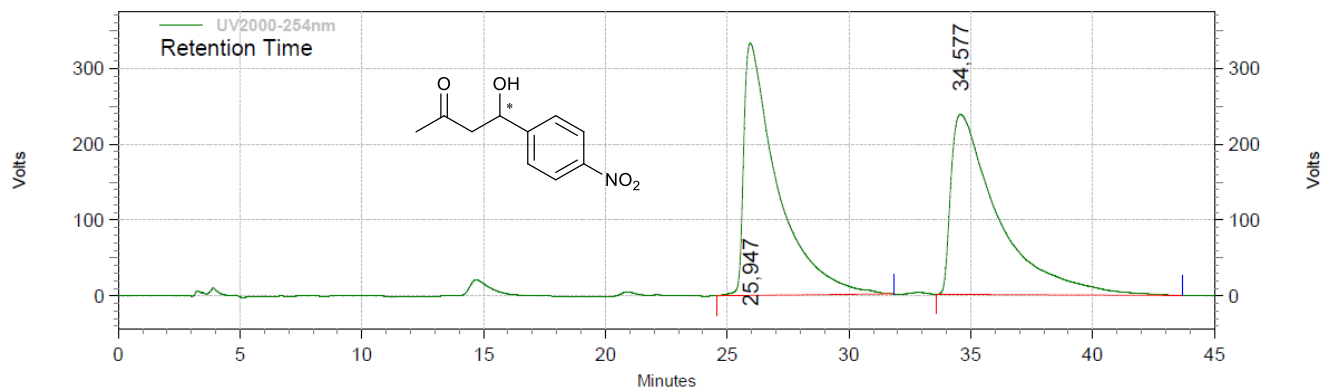

| Retention Time | Area     | Area % | Height | Height % |
|----------------|----------|--------|--------|----------|
| 25,947         | 31662683 | 49,83  | 332746 | 58,35    |
| 34,577         | 31884766 | 50,17  | 237467 | 41,65    |

L-Proline, entry 1 in Table 1.

10% mol of L-proline, in acetone at RT

Chiralpak AS-H, hexane/isopropanol 85:15,  $\lambda = 254$  nm, 1.0 ml/min

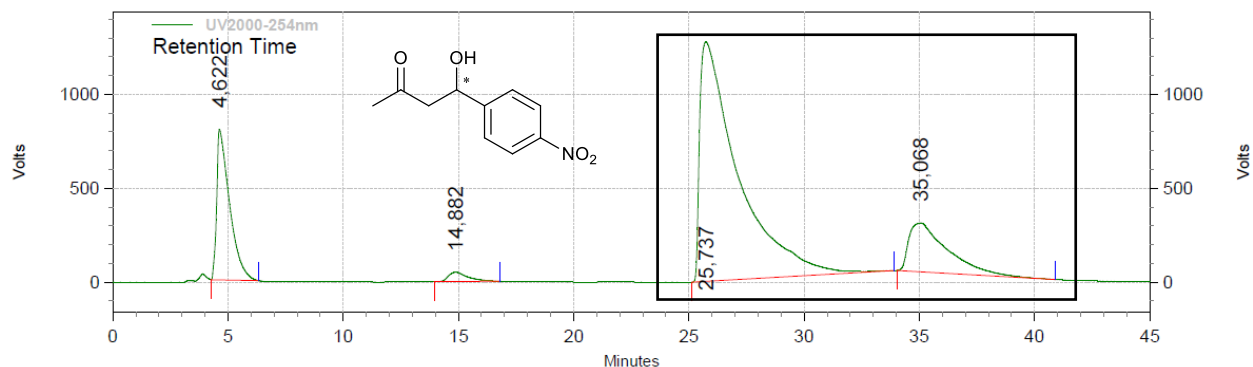

| Retention Time | Area      | Area % | Height  | Height % |
|----------------|-----------|--------|---------|----------|
| 4,622          | 31136529  | 14,69  | 802669  | 33,61    |
| 14,882         | 2868562   | 1,35   | 49269   | 2,06     |
| 25,737         | 147501851 | 69,59  | 1276016 | 53,43    |
| 35,068         | 30446184  | 14,36  | 260415  | 10,90    |

Compound **4**, entry 2 in Table 1.

10% mol of cat **4**, in acetone at RT

Chiralpak AS-H, hexane/isopropanol 85:15,  $\lambda = 254$  nm, 1.0 ml/min

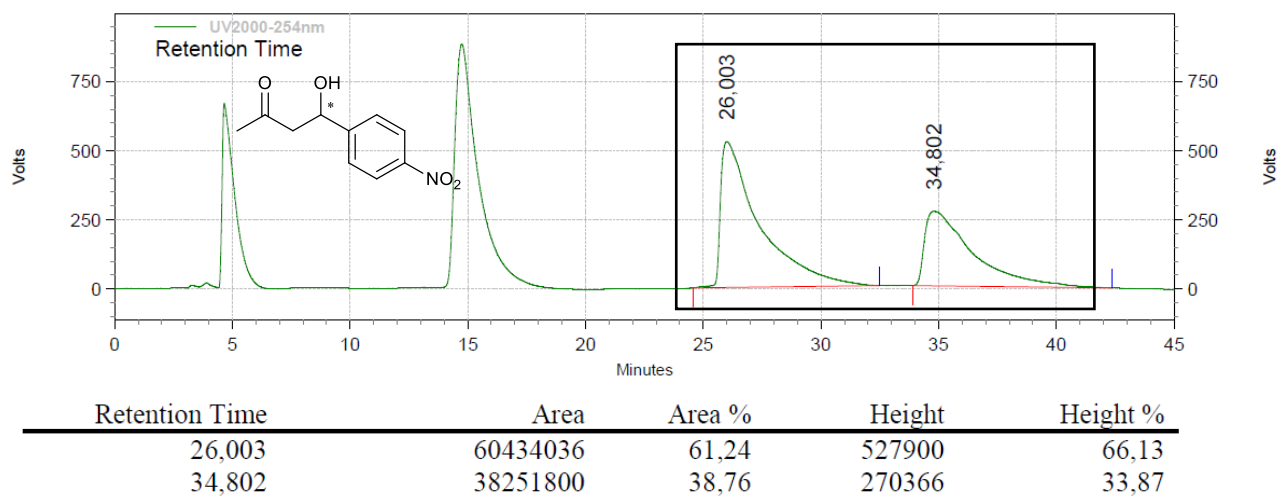

Compound **9**, entry 4 in Table 1.

10% mol of cat **9**, in acetone at RT

Chiralpak AS-H, hexane/isopropanol 85:15,  $\lambda = 254$  nm, 1.0 ml/min

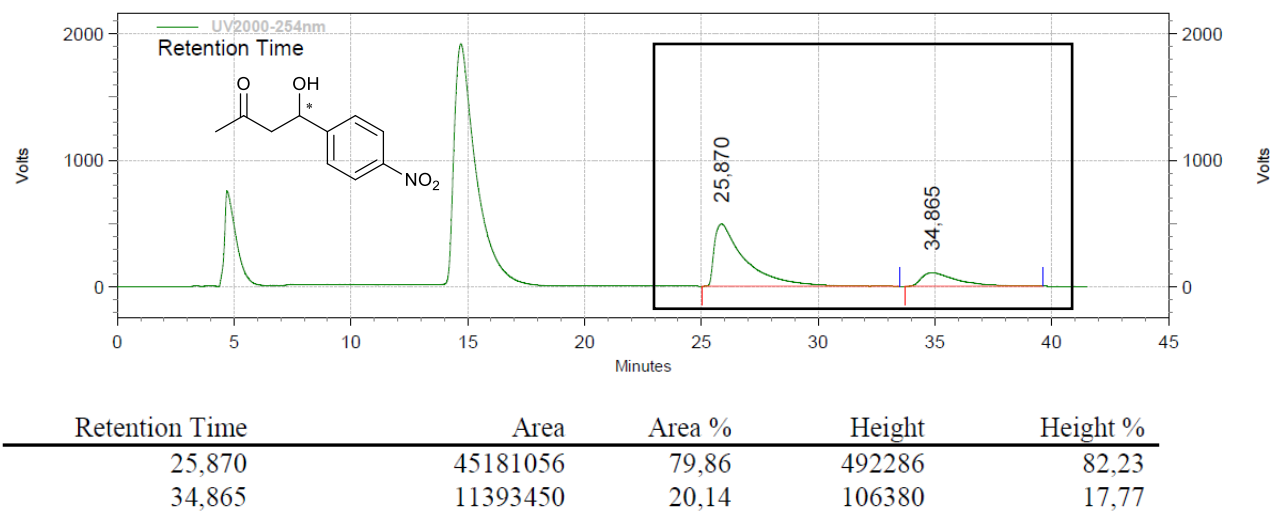

Compound **12**, entry 5 in Table 1.

10% mol of cat **12**, in acetone at RT

Chiralpak AS-H, hexane/isopropanol 85:15,  $\lambda = 254$  nm, 1.0 ml/min

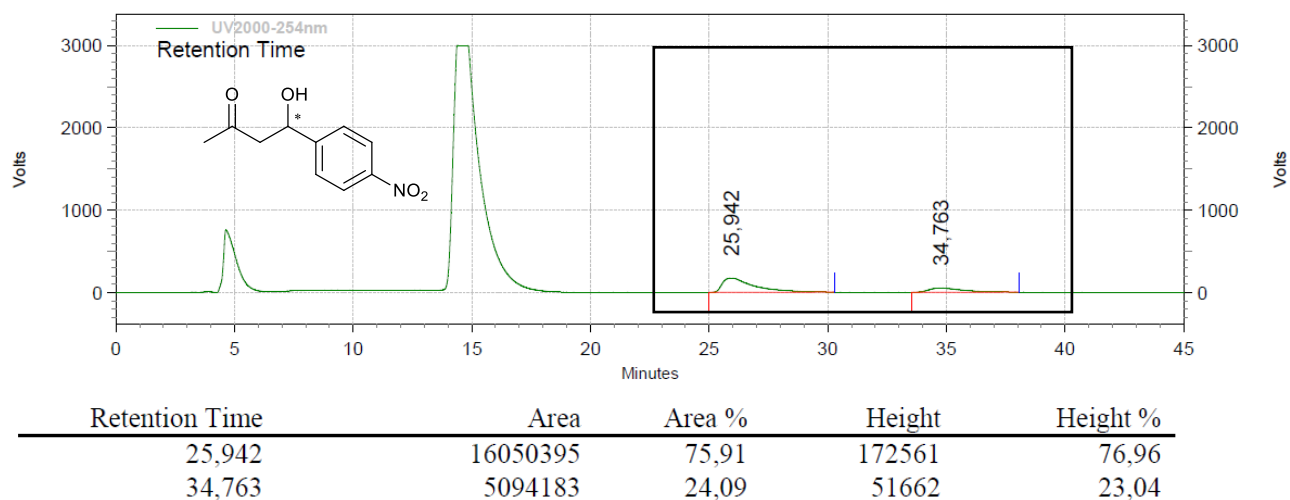

Racemic mixture

Chiralpak AD-H, hexane/isopropanol 95:5,  $\lambda = 254$  nm, 1.0 ml/min

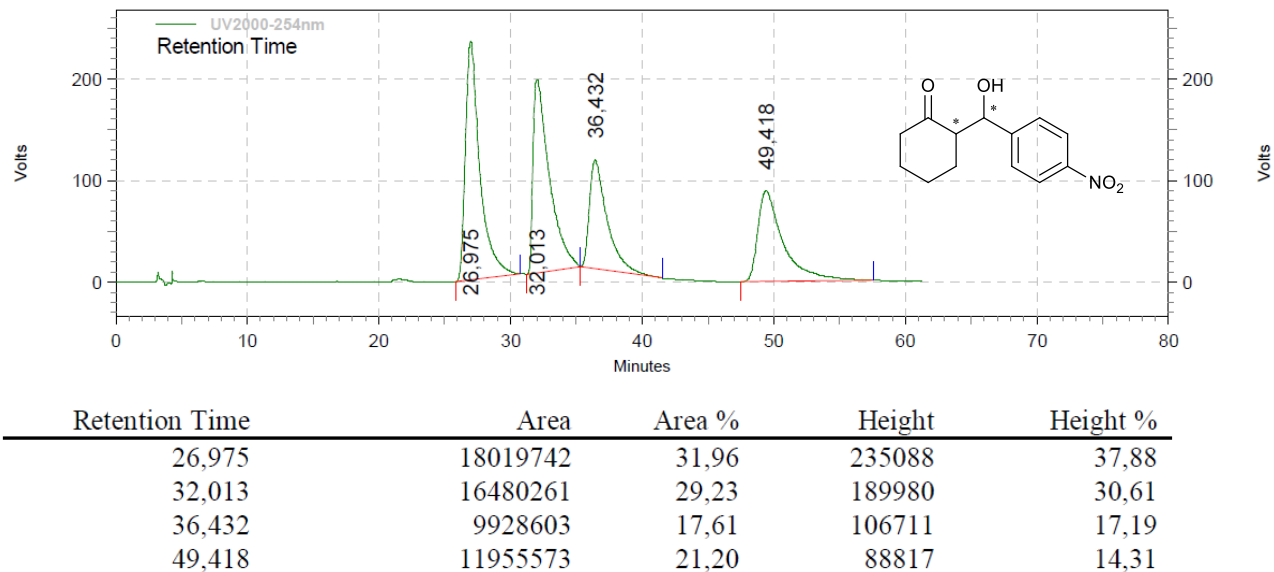

Compound **4**, entry 7 in Table 1.

10% mol of cat **4**, in CHCl<sub>3</sub> at RT

Chiralpak AD-H, hexane/isopropanol 95:5,  $\lambda$  = 254 nm, 1.0 ml/min

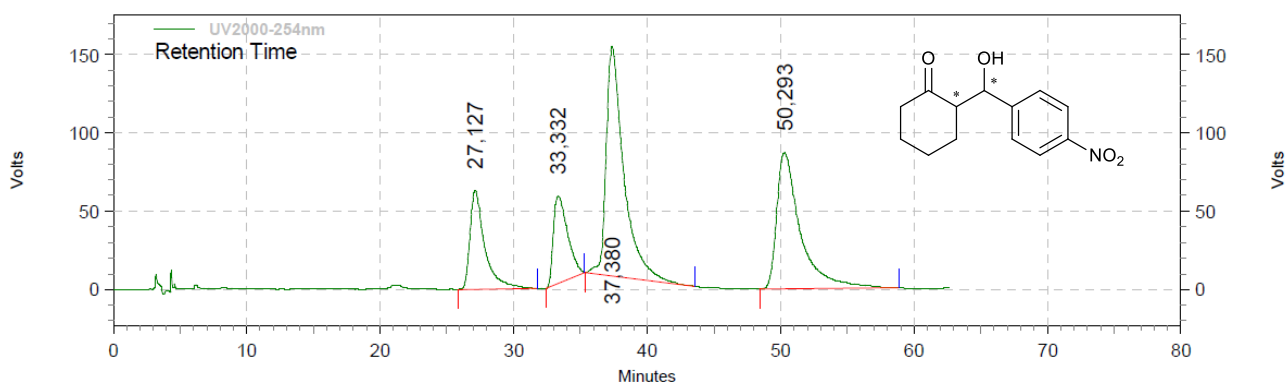

| Retention Time | Area     | Area % | Height | Height % |
|----------------|----------|--------|--------|----------|
| 27,127         | 4883342  | 14,66  | 63169  | 17,90    |
| 33,332         | 4148033  | 12,45  | 55886  | 15,83    |
| 37,380         | 13476359 | 40,45  | 146968 | 41,64    |
| 50,293         | 10806146 | 32,44  | 86938  | 24,63    |

Compound **6**, entry 8 in Table 1.

10% mol of cat **6**, in CHCl<sub>3</sub> at RT

Chiralpak AD-H, hexane/isopropanol 95:5,  $\lambda$  = 254 nm, 1.0 ml/min

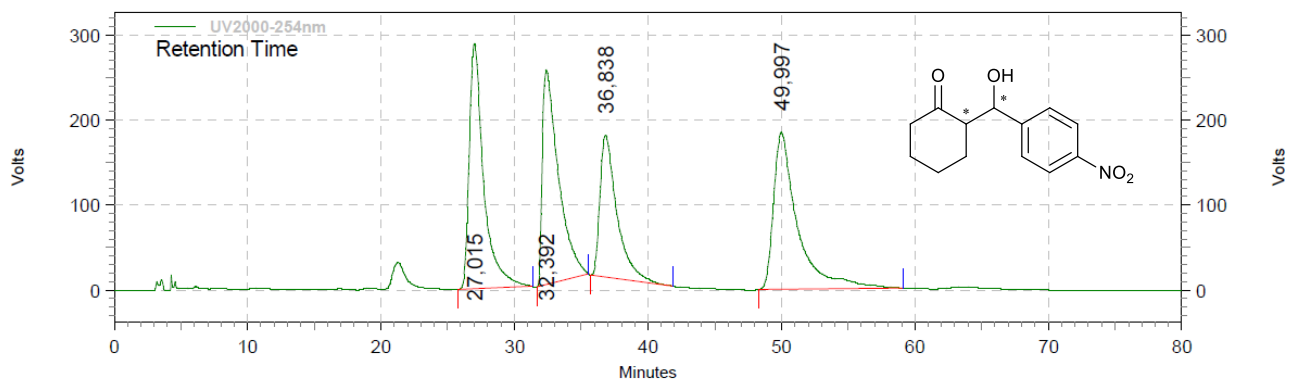

| Retention Time | Area     | Area % | Height | Height % |
|----------------|----------|--------|--------|----------|
| 27,015         | 21720497 | 26,87  | 288765 | 32,31    |
| 32,392         | 21168546 | 26,19  | 252484 | 28,25    |
| 36,838         | 14761002 | 18,26  | 167249 | 18,71    |
| 49,997         | 23191765 | 28,69  | 185290 | 20,73    |

Compound **9**, entry 10 in Table 1.

10% mol of cat **9**, in CHCl<sub>3</sub> at RT

Chiralpak AD-H, hexane/isopropanol 95:5,  $\lambda$  = 254 nm, 1.0 ml/min

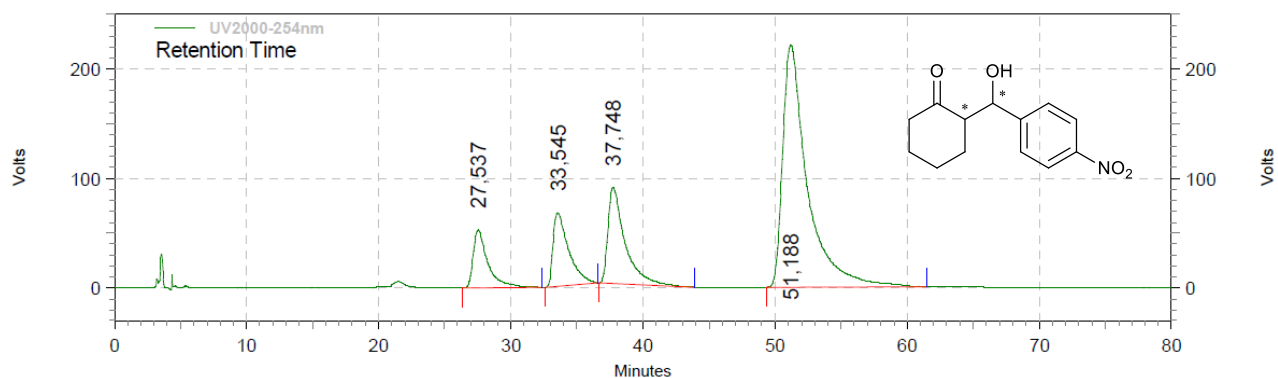

| Retention Time | Area     | Area % | Height | Height % |
|----------------|----------|--------|--------|----------|
| 27,537         | 4082268  | 8,82   | 52729  | 12,27    |
| 33,545         | 5547946  | 11,98  | 67205  | 15,64    |
| 37,748         | 7919310  | 17,10  | 87997  | 20,48    |
| 51,188         | 28753002 | 62,10  | 221643 | 51,60    |

Compound **11**, entry 12 in Table 1.

10% mol of cat **11**, in CHCl<sub>3</sub> at RT

Chiralpak AD-H, hexane/isopropanol 95:5,  $\lambda$  = 254 nm, 1.0 ml/min

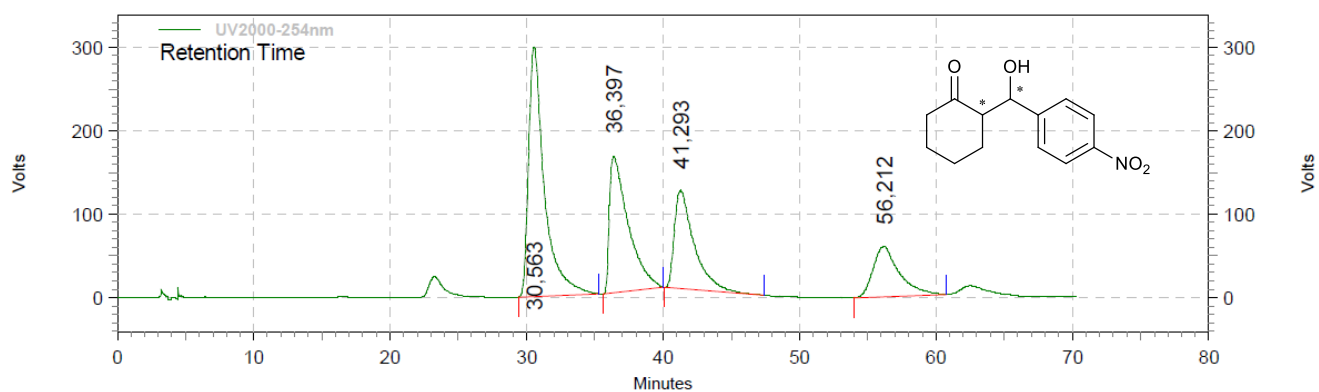

| Retention Time | Area     | Area % | Height | Height % |
|----------------|----------|--------|--------|----------|
| 30,563         | 24042476 | 40,31  | 299711 | 46,66    |
| 36,397         | 15693276 | 26,31  | 164310 | 25,58    |
| 41,293         | 11915135 | 19,98  | 118013 | 18,37    |
| 56,212         | 7992036  | 13,40  | 60275  | 9,38     |

Compound **12**, entry 13 in Table 1.

10% mol of cat **12**, in CHCl<sub>3</sub> at RT

Chiralpak AD-H, hexane/isopropanol 95:5,  $\lambda$  = 254 nm, 1.0 ml/min

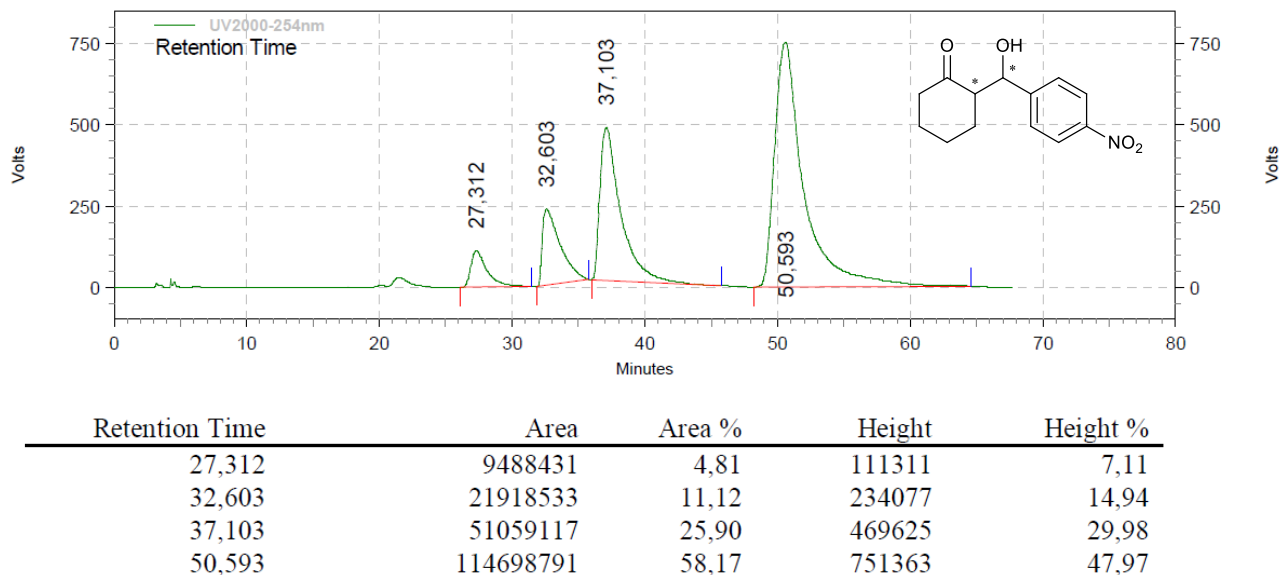

Compound **6**, entry 17 in Table 1.

10% mol of cat **6**, 20% mol HOAc, in brine at RT

Chiralpak AD-H, hexane/isopropanol 95:5,  $\lambda$  = 254 nm, 1.0 ml/min

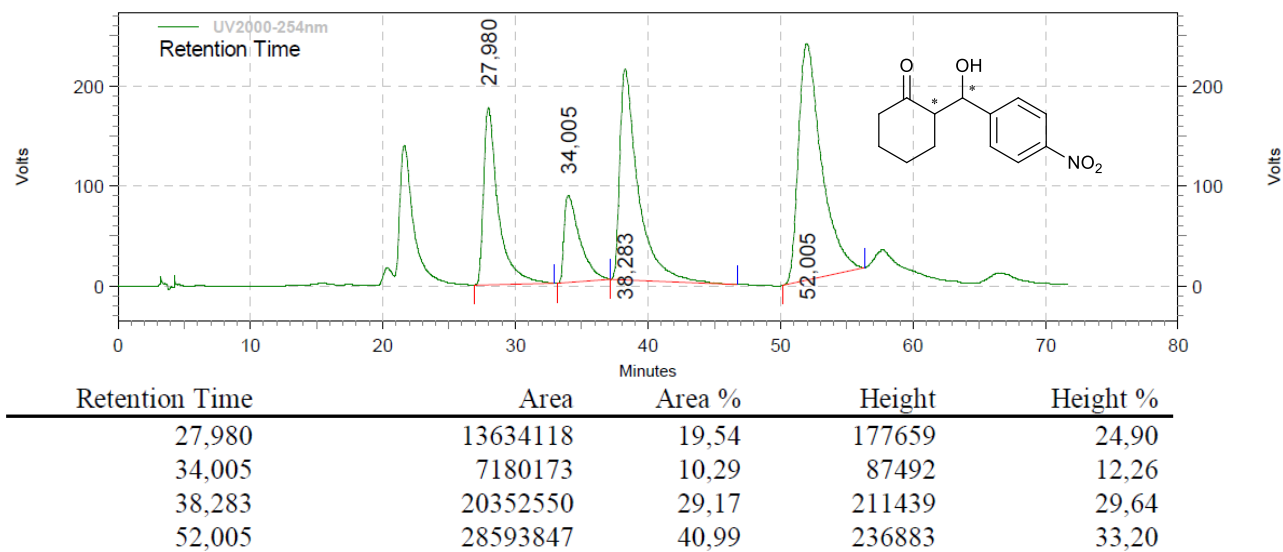

Compound **9**, entry 19 in Table 1.

10% mol of cat **9**, 20% mol HOAc, in brine at RT

Chiralpak AD-H, hexane/isopropanol 95:5,  $\lambda = 254$  nm, 1.0 ml/min

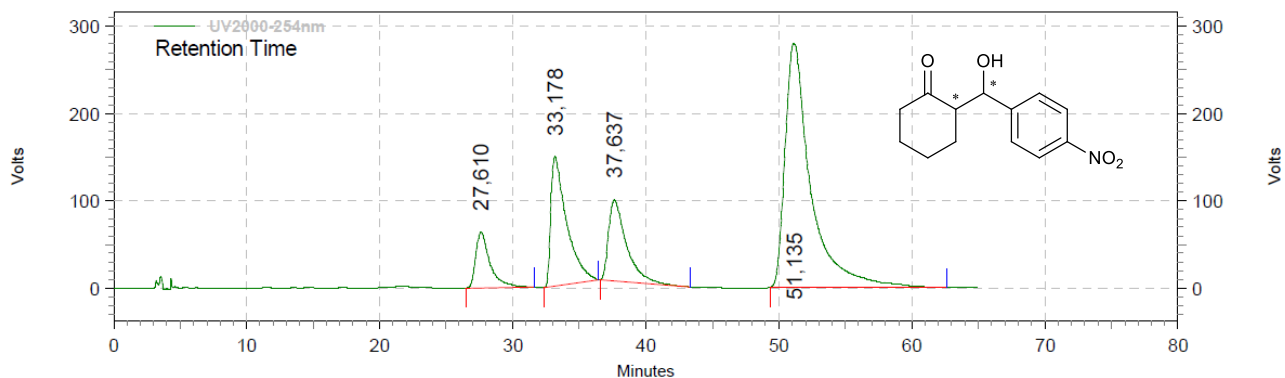

| Retention Time | Area     | Area % | Height | Height % |
|----------------|----------|--------|--------|----------|
| 27,610         | 4828495  | 7,60   | 64233  | 10,97    |
| 33,178         | 12317926 | 19,39  | 148056 | 25,29    |
| 37,637         | 8650584  | 13,62  | 92998  | 15,88    |
| 51,135         | 37739298 | 59,40  | 280253 | 47,86    |

Compound **11**, entry 21 in Table 1.

10% mol of cat **11**, 20% mol HOAc, in brine at RT

Chiralpak AD-H, hexane/isopropanol 95:5,  $\lambda = 254$  nm, 1.0 ml/min

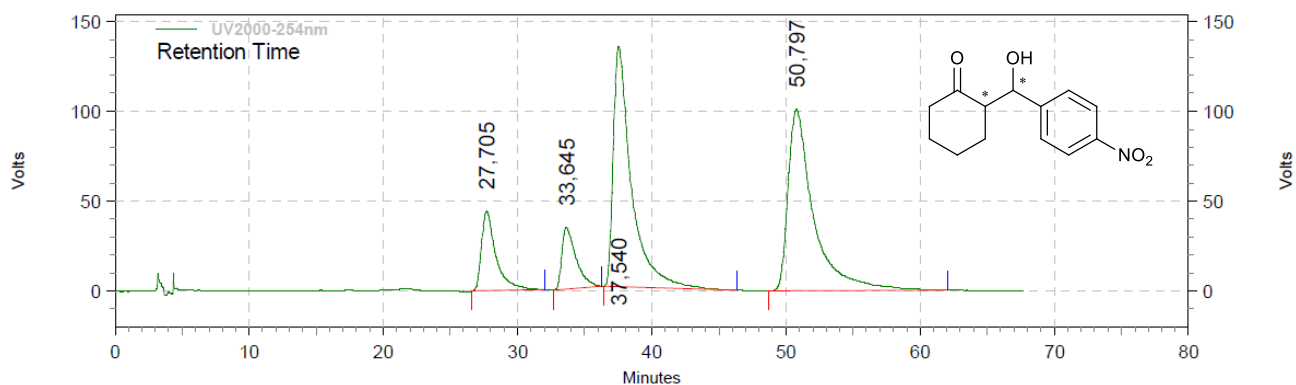

| Retention Time | Area     | Area % | Height | Height % |
|----------------|----------|--------|--------|----------|
| 27,705         | 3361346  | 10,51  | 44262  | 14,12    |
| 33,645         | 2525043  | 7,90   | 34119  | 10,88    |
| 37,540         | 12613926 | 39,46  | 133951 | 42,73    |
| 50,797         | 13468111 | 42,13  | 101172 | 32,27    |

Compound **11**, entry 21 in Table 1.

10% mol of cat **11**, 20% mol HOAc, in brine at RT

Chiralpak AD-H, hexane/isopropanol 95:5,  $\lambda = 254$  nm, 1.0 ml/min

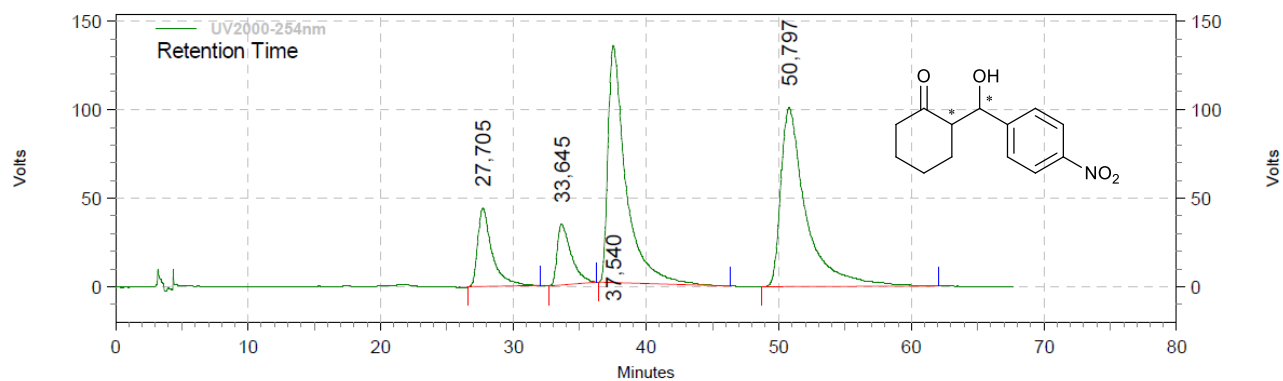

| Retention Time | Area     | Area % | Height | Height % |
|----------------|----------|--------|--------|----------|
| 27,705         | 3361346  | 10,51  | 44262  | 14,12    |
| 33,645         | 2525043  | 7,90   | 34119  | 10,88    |
| 37,540         | 12613926 | 39,46  | 133951 | 42,73    |
| 50,797         | 13468111 | 42,13  | 101172 | 32,27    |

### 3. NMR Spectra of Catalysts **8** and **12**

*N*-((1*S*,3*R*,4*R*)-2-azabicyclo[2.2.1]heptan-3-ylmethyl)pyrrolidine-2-carboxamide (**8**)

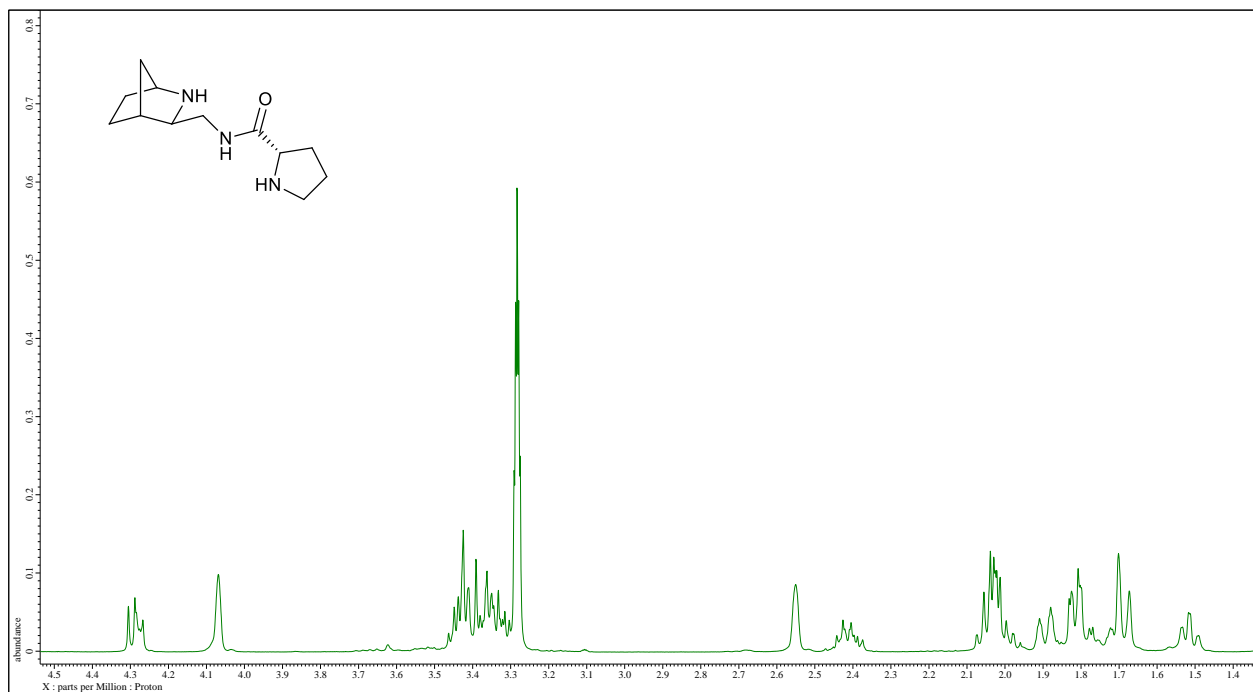

<sup>1</sup>H NMR spectrum of *N*-((1*S*,3*R*,4*R*)-2-azabicyclo[2.2.1]heptan-3-ylmethyl)pyrrolidine-2-carboxamide (**8**)

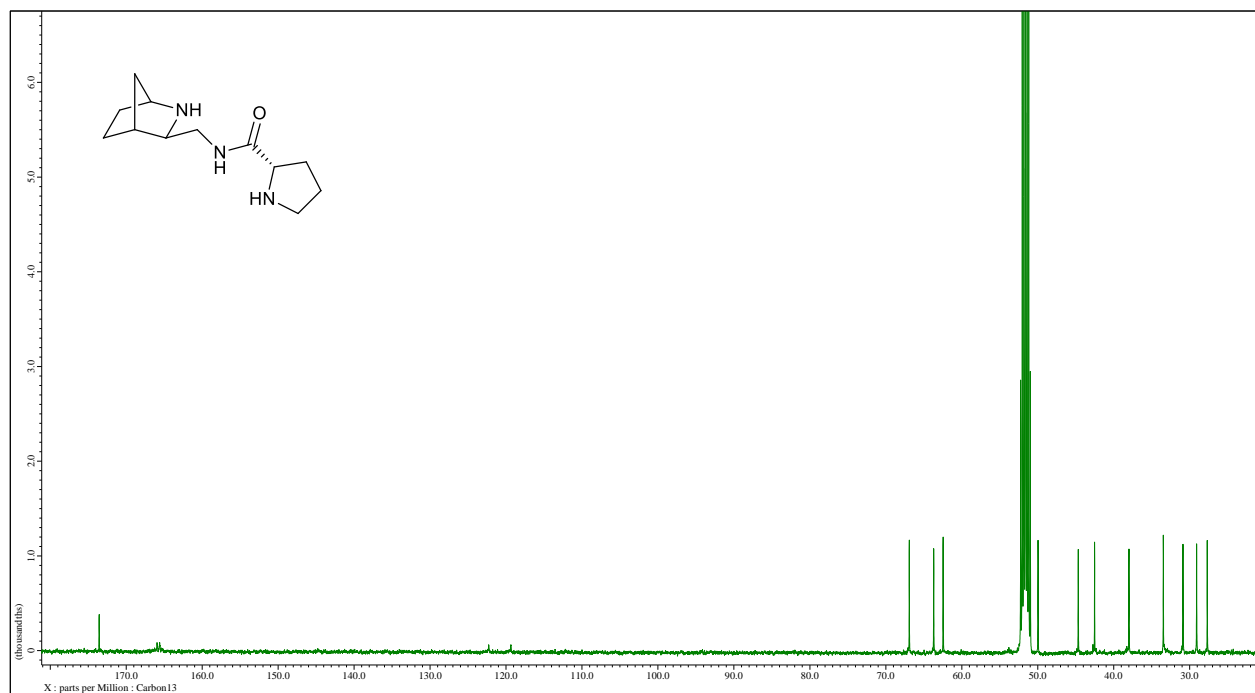

<sup>13</sup>C NMR spectrum of *N*-((1*S*,3*R*,4*R*)-2-azabicyclo[2.2.1]heptan-3-ylmethyl)pyrrolidine-2-carboxamide (**8**)

Colorless crystals . Yield 84.5 mg (64%), mp. 65°C,  $[\alpha]_{\text{D}}^{20} = -26.3$  (c 0.0057, MeOH).  $^1\text{H}$  NMR (400 MHz, MeOH- $\text{d}_4$ ):  $\delta$  1.53-1.57 (m, 1H), 1.71-1.94 (m, 6H), 2.02-2.11 (m, 3H), 2.41-2.48 (m, 1H), 2.58 (br s, 1H), 3.34-3.50 (m, 4H), 4.10 (br s, 1H), 4.30-4.34 (m, 1H) ppm.  $^{13}\text{C}$  NMR (400 MHz, MeOH- $\text{d}_4$ ):  $\delta$  27.7, 29.1, 30.9, 33.5, 38.0, 42.5, 44.7, 50.0, 62.4, 63.7, 66.9, 173.6 ppm. HRMS (ESI $^+$ , m/z): calcd for  $\text{C}_{12}\text{H}_{21}\text{N}_3\text{O}$  ( $[\text{M}+\text{H}]^+$ ) 224.1763; found 224.1758.

*N*-(((1*S*,3*R*,4*R*)-2-(1-phenylethyl)-2-azabicyclo[2.2.1]heptan-3-yl)methyl)pyrrolidine-2-carboxamide (**12**)

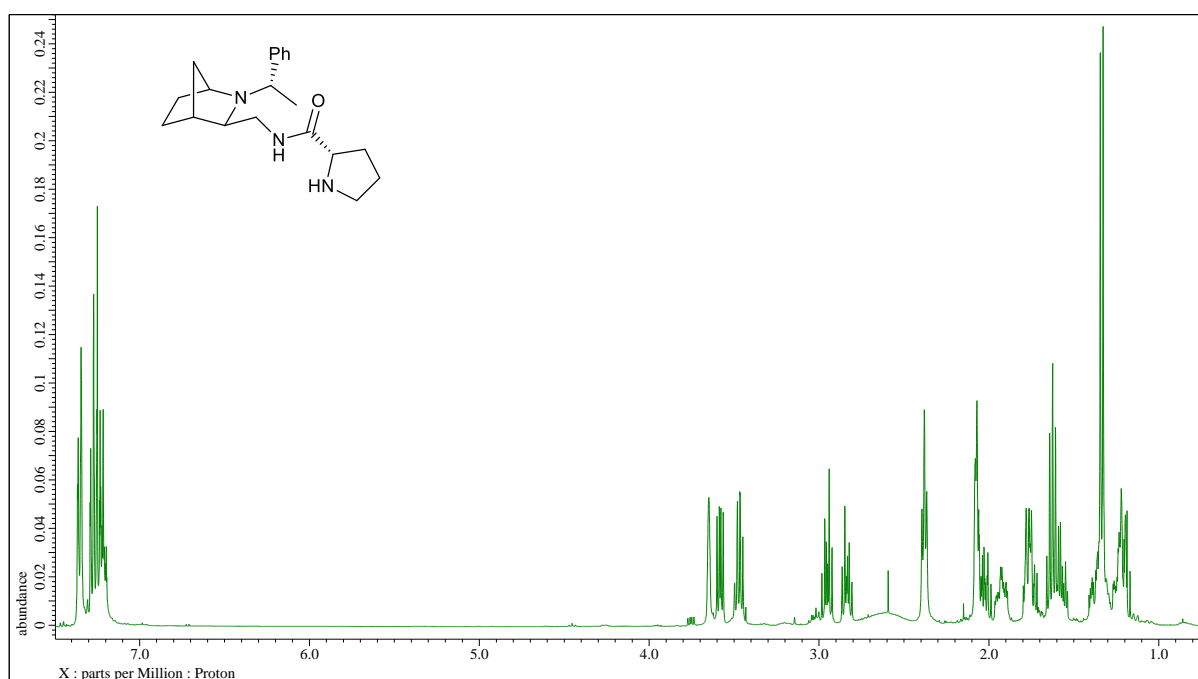

$^1\text{H}$  NMR spectrum of *N*-(((1*S*,3*R*,4*R*)-2-(1-phenylethyl)-2-azabicyclo[2.2.1]heptan-3-yl)methyl)pyrrolidine-2-carboxamide (**12**)

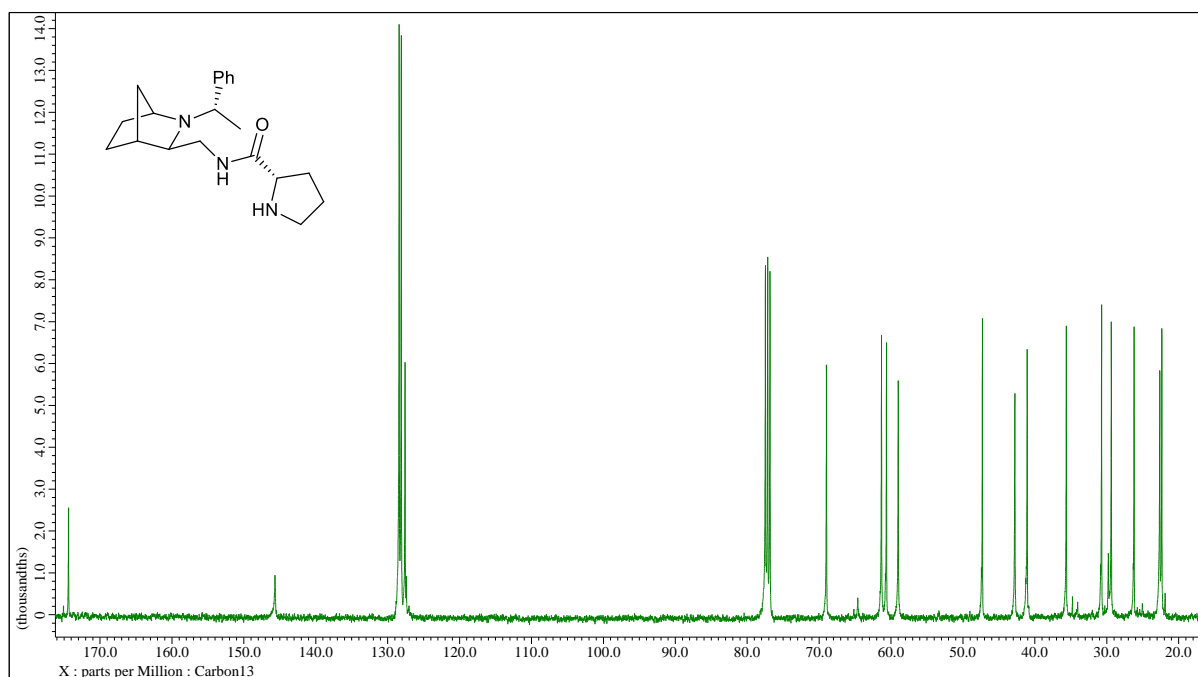

<sup>13</sup>C NMR spectrum of *N*-(((1*S*,3*R*,4*R*)-2-(1-phenylethyl)-2-azabicyclo[2.2.1]heptan-3-yl)methyl)pyrrolidine-2-carboxamide (**12**)

Yellow oil. Yield 0.39 g (62%).  $[\alpha]_{\text{D}}^{20} = 42.6$  (c 0.60, CH<sub>2</sub>Cl<sub>2</sub>). <sup>1</sup>H NMR (400 MHz, CDCl<sub>3</sub>)  $\delta$  = 1.19-1.26 (m, 3H), 1.29-1.41 (m, 4H), 1.54-1.66 (m, 3H), 1.71-1.78 (m, 1H), 1.99-2.08 (m, 3H), 2.38 (t, 2H,  $J = 5, 6$  Hz), 2.59 (br s, 1H), 2.81-2.86 (m, 1H), 2.92-2.98 (m, 1H), 3.47 (q, 1H,  $J = 6.4$  Hz), 3.56-3.60 (m, 1H), 3.65 (br s, 1H), 7.19-7.36 (m, 5H) ppm. <sup>13</sup>C NMR (75 MHz, CDCl<sub>3</sub>)  $\delta$  = 22.3, 22.6, 26.3, 29.4, 30.7, 35.6, 41.1, 42.8, 47.3, 59.0, 60.6, 61.3, 68.9, 127.6, 128.1, 128.4, 145.7, 174.4 ppm. HRMS (ESI<sup>+</sup>): calcd for C<sub>20</sub>H<sub>29</sub>N<sub>3</sub>O [M+H]<sup>+</sup> 328.2389; found 328.2379.
